# Supplementary material for: New multifunctional hybrids as modulators of apoptosis markers and topoisomerase II in breast cancer therapy: synthesis, characterization, and in vitro and in silico studies
Source: Royal Society of Chemistry journal article supplement (doi:10.1039/d4ra04219k), 2024-01-01
Supplement: d4ra04219k1.pdf [file d4ra04219k1.pdf]

## Title Page

### New multifunctional hybrids as modulators of apoptosis markers and topoisomerase II in breast cancer therapy: Synthesis, characterization, *in vitro*, and *in-silico* studies

Heba W. Alhamdi<sup>1</sup>, Mohammad Y. Alfaifi<sup>2,3</sup>, Ali A Shati<sup>2,3</sup>, Serag Eldin I. Elbehairi<sup>2,3,4</sup>, Mohammed Er-rajy<sup>5</sup>, Reda F. M. Elshaarawy<sup>6,7,\*</sup>, Yasser A. Hassan<sup>8</sup>, Rozan Zakrya<sup>9</sup>

<sup>1</sup> College of Sciences, Biology Department, King Khalid University, Abha 61413, Saudi Arabia.

<sup>2</sup> King Khalid University, Faculty of Science, Biology Department, Abha 9004, Saudi Arabia.

<sup>3</sup> Tissue Culture and Cancer Biology Research Laboratory, King Khalid University, Abha, 9004, Saudi Arabia

<sup>4</sup> Cell Culture Lab, Egyptian Organization for Biological Products and Vaccines (VACSERA Holding Company), 51 Wezaret El-Zeraa St., Agouza, Giza, Egypt.

<sup>5</sup> LIMAS Laboratory, Faculty of Sciences Dhar El Mahraz, Sidi Mohamed Ben Abdellah University, Fez, Morocco.

<sup>6</sup> Department of Chemistry, Faculty of Science, Suez University, 43533 Suez, Egypt.

<sup>7</sup> Institut für Anorganische Chemie und Strukturchemie, Heinrich-Heine Universität Düsseldorf, Düsseldorf, Germany.

<sup>8</sup> Department of pharmaceuticals, Faculty of Pharmacy, Delta University for Science and Technology, Gamasa, Egypt.

<sup>9</sup> Chemistry department, Faculty of Science, Port-Said University, Port-Said, Egypt; [rzakrya@yahoo.com](mailto:rzakrya@yahoo.com)

\* Correspondence: RFME, [reda.elshaarawy@suezuniv.edu.eg](mailto:reda.elshaarawy@suezuniv.edu.eg)

## Contents

1. Materials and Instrumentation
2. Preparation of benzenediazonium chloride
3. Preparation of 7-hydroxy-4-methylquinolin-2(1H)-one (HMQ)
4. Figures Captions
5. Tables Captions

## 1. Materials and Instrumentation

### 1.1. Materials

Chemicals were obtained from the following suppliers and used without further purification: *o*-vanillin, (Roth), anhydrous zinc chloride ( $\text{ZnCl}_2$ ) (GRÜSSING GmbH), thiosemicarbazide hydrochloride (**3**) (TCI), potassium thiocyanate (KSCN), anhydrous potassium carbonate ( $\text{K}_2\text{CO}_3$ ), sodium bicarbonate ( $\text{NaHCO}_3$ ), sodium sulphate anhydrous ( $\text{Na}_2\text{SO}_4$ ), sodium hydroxide (NaOH) and 3% hydrogen peroxide ( $\text{H}_2\text{O}_2$ ) (ADWIC).

### 1.2. Instrumentation

Melting points (uncorrected) were determined in open glass capillaries on a Gallenkamp melting point apparatus. Elemental analyses for C, H, N and S were performed with a Perkin–Elmer 263 elemental analyzer. FT-IR spectra were recorded on a BRUKER Tensor-37 FT-IR spectrophotometer in the range 400–4000  $\text{cm}^{-1}$  as KBr discs or in the 4000–550  $\text{cm}^{-1}$  region with 2  $\text{cm}^{-1}$  resolution with an ATR (attenuated total reflection) unit (Platinum ATR-QL, Diamond). For signal intensities the following abbreviations were used: br (broad), sh (sharp), w (weak), m (medium), s (strong), vs (very strong). NMR-spectra were obtained with a Bruker Avance DRX200 (200 MHz for  $^1\text{H}$ ) or Bruker Avance DRX500 (500 MHz for  $^{13}\text{C}$ ) spectrometer with calibration to the residual proton solvent signal in DMSO- $d_6$  ( $^1\text{H}$  NMR: 2.52 ppm,  $^{13}\text{C}$  NMR: 39.5 ppm),  $\text{CDCl}_3$  ( $^1\text{H}$  NMR: 7.26 ppm,  $^{13}\text{C}$  NMR: 77.16 ppm) against TMS with  $\delta = 0.00$  ppm. Multiplicities of the signals were specified s (singlet), d (doublet), t (triplet), q (quartet) or m (multiplet). The mass spectra of the synthesized salicylaldehyde ionic liquids (Sal-ILs) were acquired in the linear mode for positive ions on a BRUKER Ultraflex MALDI-TOF instrument equipped with a 337 nm nitrogen laser pulsing at a repetition rate of 10 Hz.

## 2. Preparation of benzenediazonium chloride

An aqueous solution of  $\text{PhN}_2^+\text{Cl}^-$  is obtained by adding a stoichiometric amount of  $\text{NaNO}_2$  at 0–5 °C to the solution obtained from aniline and excess hydrochloric acid in water. An excess of nitrite ions at the end of the reaction should be avoided, since they reduce the stability of the diazonium salt solution and can interfere with some further transformations.

## 3. Preparation of 7-hydroxy-4-methylquinolin-2(1H)-one (HMQ)

A mixture of 3-aminophenol (20.0 g, 183.3mmol) and ethyl acetoacetate (23.3mL, 183.3 mmol) was heated at 150 °C for 20 h to give a yellow sticky mass which after cooling solidified upon treatment with methanol (30 mL). The solid was chromatographed on silica gel, eluting with dichloromethane to yield the following, in order of elution. (i) 4-Methyl-7-aminocoumarin (7%; EtOH): mp 222 °C,  $^1\text{H}$  NMR (acetone- $d_6$ ) 6.75 (d,  $J = 8.6$  Hz, 1H, H-5), 6.65 (dd,  $J = 8.6$  and 2.2 Hz, 1H, H-6), 6.50 (d,  $J = 2.2$  Hz, 1H, H-8), 5.94 (q,  $J = 1.1$ Hz, 1H, H-3), 2.38 (d,  $J = 1.1$ Hz, 3 H, Me-4). Anal. Calcd for  $\text{C}_{10}\text{H}_8\text{NO}_2$ : C, 68.56; H, 5.18;

N, 8.00. Found: C, 68.33; H, 5.19; N, 7.93. (ii) 4-Methyl-5-hydroxyquinolin-2-one (8) (16%; MeOH): mp 300 °C; <sup>1</sup>HNMR (acetone-d<sub>6</sub>) 7.28 (dd, J = 8.1 and 8.0 Hz, 1H, H-7), 6.80 (dd, J = 8.1 and 1.1 Hz, 1H, H-6 or H-8), 6.61 (dd, J = 8.0 and 1.1 Hz, 1H, H-6 or H-8), 6.28 (q, d = 1.2 Hz, 1H, H-3), 2.72 (d, J = 1.2 Hz, 3H, Me-4). Anal. Calcd for C<sub>10</sub>H<sub>8</sub>NO<sub>2</sub>: C, 68.56; H, 5.18; N, 8.00. Found: C, 68.26; H, 5.15; N, 7.91.

## Figures Captions

**Fig. S1:**  $^1\text{H}$  NMR spectrum of the newly synthesized ligand (PAHMQ) in  $\text{DMSO-d}_6$ .

**Fig. S2:**  $^{13}\text{C}$  NMR spectrum of PAHMQ.

**Fig. S3:**  $^1\text{H}$  NMR spectrum of PAHMQ in a  $\text{DMSO-d}_6$ - $\text{D}_2\text{O}$  mixture.

**Fig. S4:** Thermal curves of PAHMQ.

**Fig. S5:** Thermal curves of CoPAHMQ.

**Fig. S6:** Thermal curves of CuPAHMQ.

**Fig. S7:** Thermal curves of ZnPAHMQ.

**Fig. S8:** Morphological alterations of untreated MCF-7 cells (control)

**Fig. S9:** Morphological alterations of MCF-7 cells after 24 h treatment with serial concentrations PAHMQ.

**Fig. S10:** Morphological alterations of MCF-7 cells after 24 h treatment with serial concentrations of CoPAHMQ.

**Fig. S11:** Morphological alterations of MCF-7 cells after 24 h treatment with serial concentrations of CuPAHMQ.

**Fig. S12:** Morphological alterations of MCF-7 cells after 24 h treatment with serial concentrations of ZnPAHMQ.

**Fig. S13:** Morphological alterations of untreated MCF-10A cells (control)

**Fig. S14:** Morphological alterations of MCF-10A cells after 24 h treatment with serial concentrations PAHMQ.

**Fig. S15:** Morphological alterations of MCF-10A cells after 24 h treatment with serial concentrations of CoPAHMQ.

**Fig. S16:** Morphological alterations of MCF-10A cells after 24 h treatment with serial concentrations of CuPAHMQ.

**Fig. S17:** Morphological alterations of MCF-10A cells after 24 h treatment with serial concentrations of ZnPAHMQ.



Rozan Zakaria-ligand Rt-carbon-DMSO-D

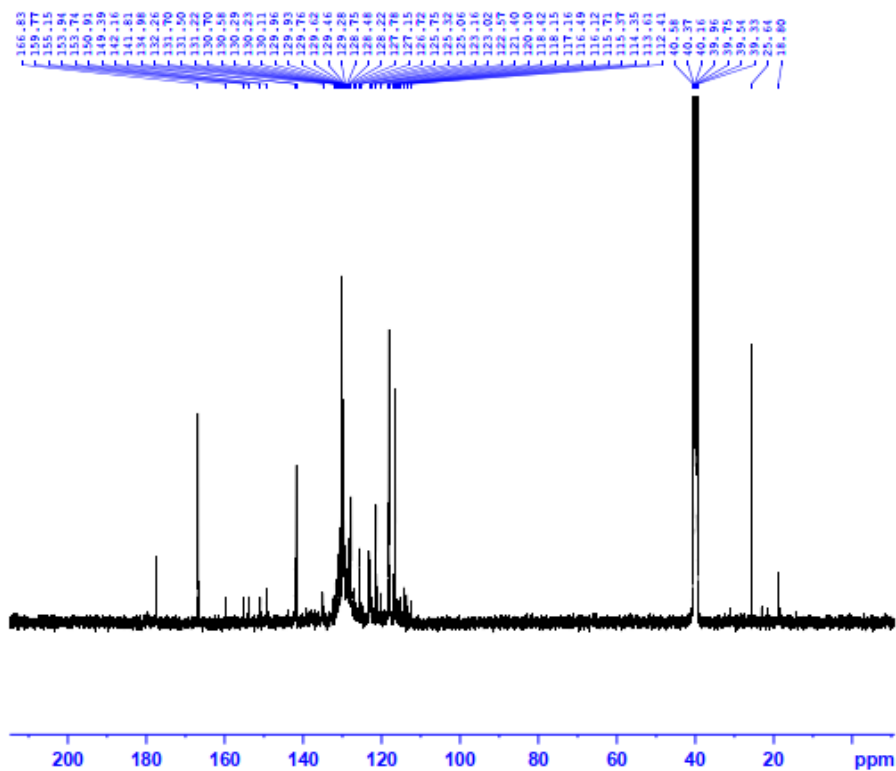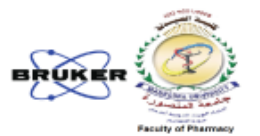

Current Data Parameters  
 NAME Rozan Zakaria-ligand Rt-carbon-DMSO-D  
 EXPNO 10  
 PROCNO 1

F2 - Acquisition Parameters  
 Date\_ 20231118  
 Time 22.12 h  
 INSTRUM spect  
 PROBRD 210MC18\_0915 f  
 PULPROG zgpg30  
 TD 65536  
 FIDRES 0.30000000  
 SOLVENT DMSO  
 NS 2000  
 DS 4  
 SWH 20298.641 Hz  
 FIDRES 0.751898 Hz  
 AQ 1.343188 sec  
 RG 197.77  
 CW 20.850 uVHz  
 DE 6.50 uVHz  
 TE 298.2 K  
 D3 7.00000000 sec  
 D31 0.20000000 sec  
 TSD 1  
 SFO1 100.6261331 MHz  
 NS1 130  
 F1 10.00 uVHz  
 PLM1 07.00000000 W  
 SFO2 400.2014626 MHz  
 SFO3 100.6261331 MHz  
 CPOW12 100.00000000 W  
 PCPO2 90.00 uVHz  
 PLM2 13.00000000 W  
 PLM3 0.20000000 W  
 PLM4 0.11710000 W

F2 - Processing parameters  
 SI 32768  
 SF 100.6261330 MHz  
 WHW 0 EM  
 SSB 0  
 LB 1.00 Hz  
 GB 0  
 PC 1.00

Fig. S2

Rozan Zakaria-ligand Rt-D2O-RR

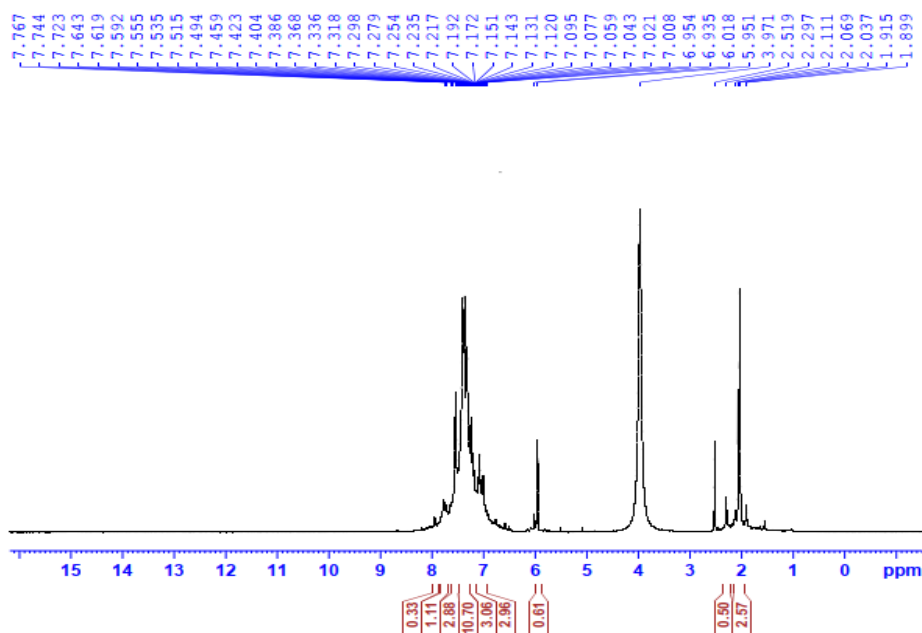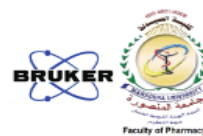

Current Data Parameters  
 NAME Rozan Zakaria-ligand Rt-D2O-RR  
 EXPNO 10  
 PROCNO 1

F2 - Acquisition Parameters  
 Date\_ 20231118  
 Time 11.10 h  
 INSTRUM spect  
 PROBRD 210MC18\_0915 f  
 PULPROG zgpg30  
 TD 65536  
 FIDRES 0.30000000  
 SOLVENT DMSO  
 NS 2000  
 DS 4  
 SWH 8012.810 Hz  
 FIDRES 0.244851 Hz  
 AQ 4.0824405 sec  
 RG 10.97  
 CW 42.400 uVHz  
 DE 6.50 uVHz  
 TE 298.0 K  
 D3 1.00000000 sec  
 TSD 1  
 SFO1 400.2024712 MHz  
 NS1 130  
 F1 10.00 uVHz  
 PLM1 13.00000000 W

F2 - Processing parameters  
 SI 32768  
 SF 400.2024712 MHz  
 WHW 0 EM  
 SSB 0  
 LB 0.30 Hz  
 GB 0  
 PC 1.00

Fig. S3

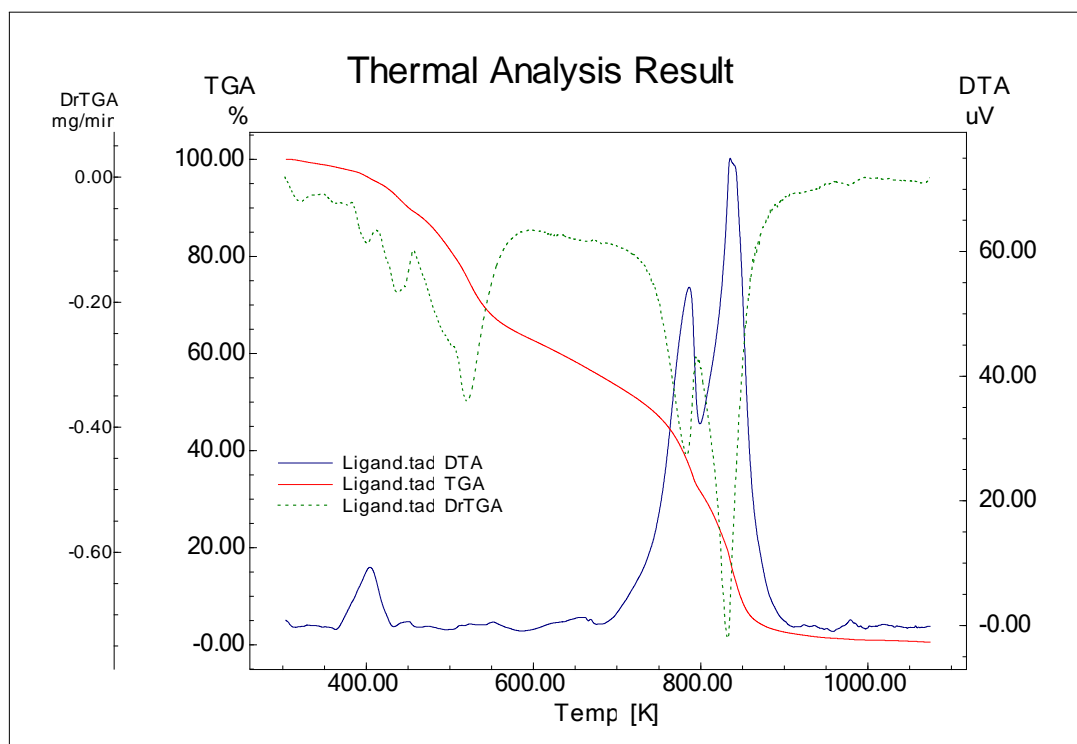

**Fig. S4**

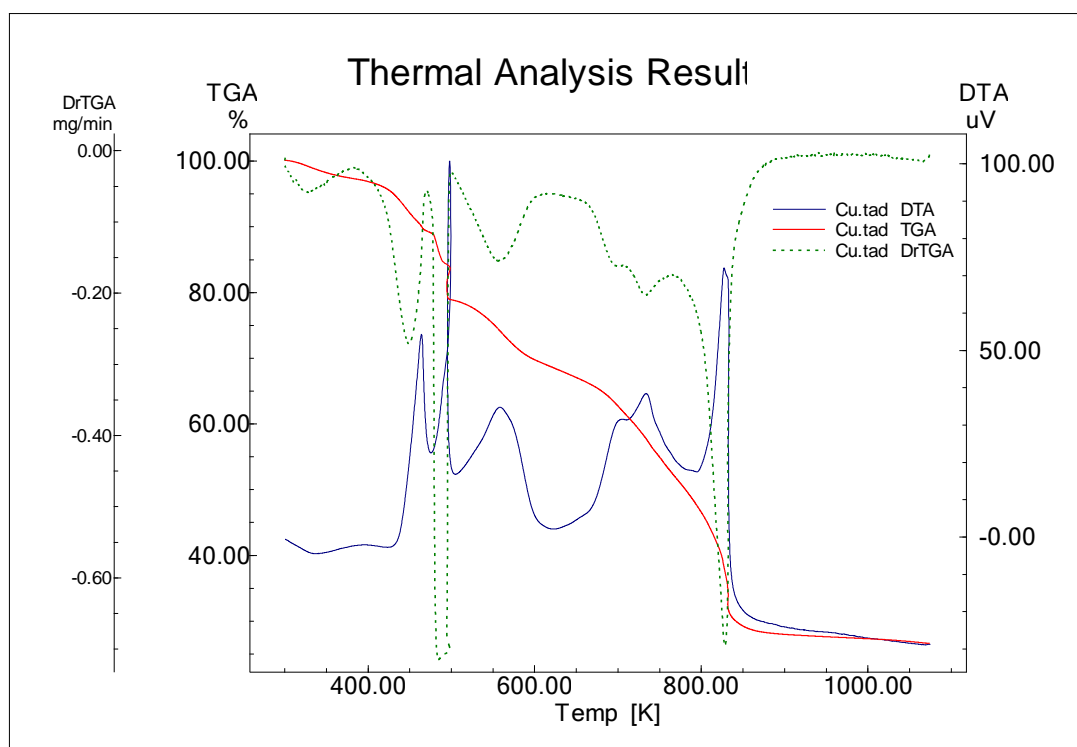

**Fig. S5**

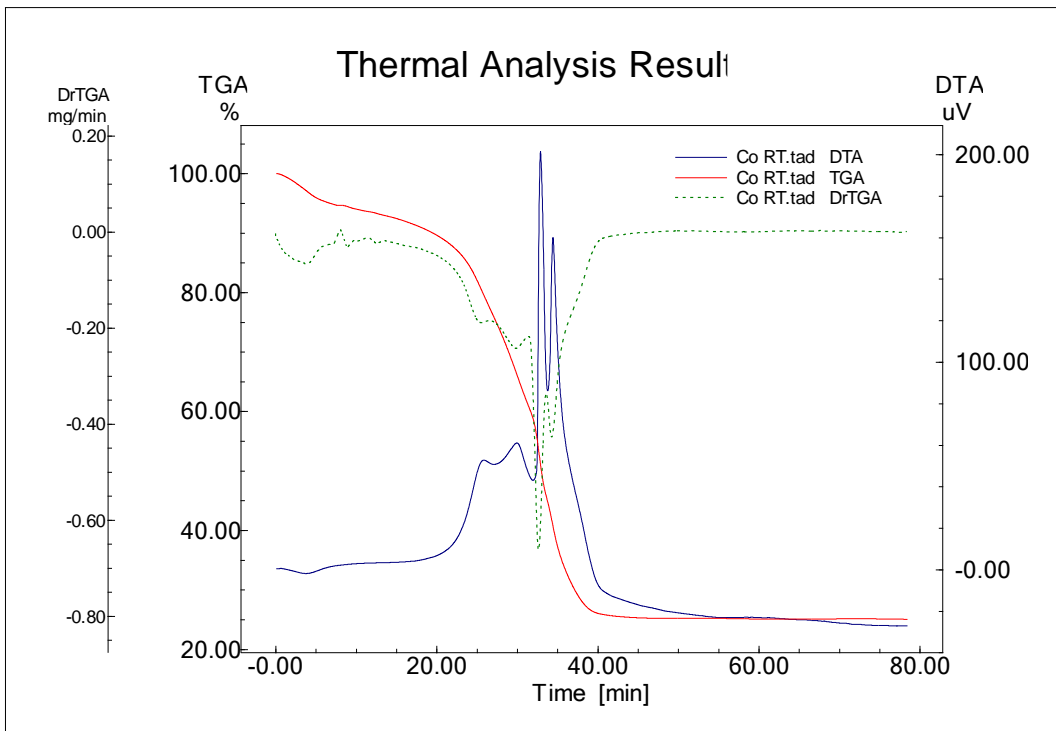

**Fig. S6**

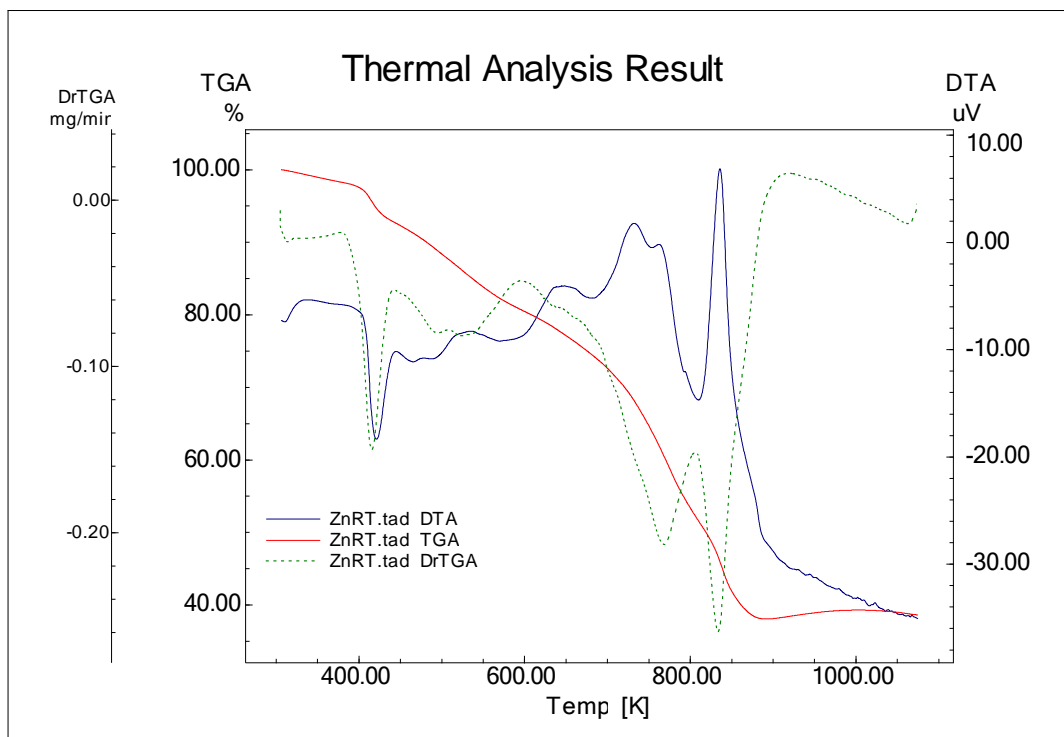

**Fig. S7**



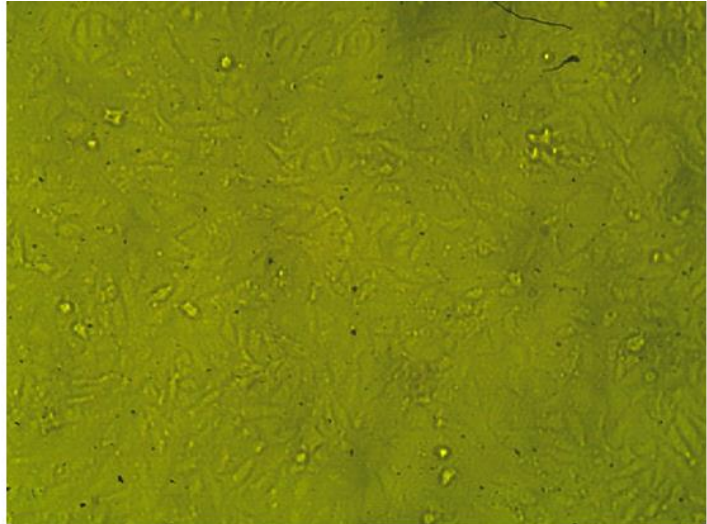

**control**  
**Mcf7 cells**

Organism : *Homo sapiens*, human  
Tissue : mammary gland, breast; derived from metastatic site: pleural effusion  
Cell Type : epithelial  
Culture Properties : adherent  
Disease : adenocarcinoma  
ATCC : HTB-22

**Fig. S8**

## Effect of sample ligand on Mcf7 cells at different concentration

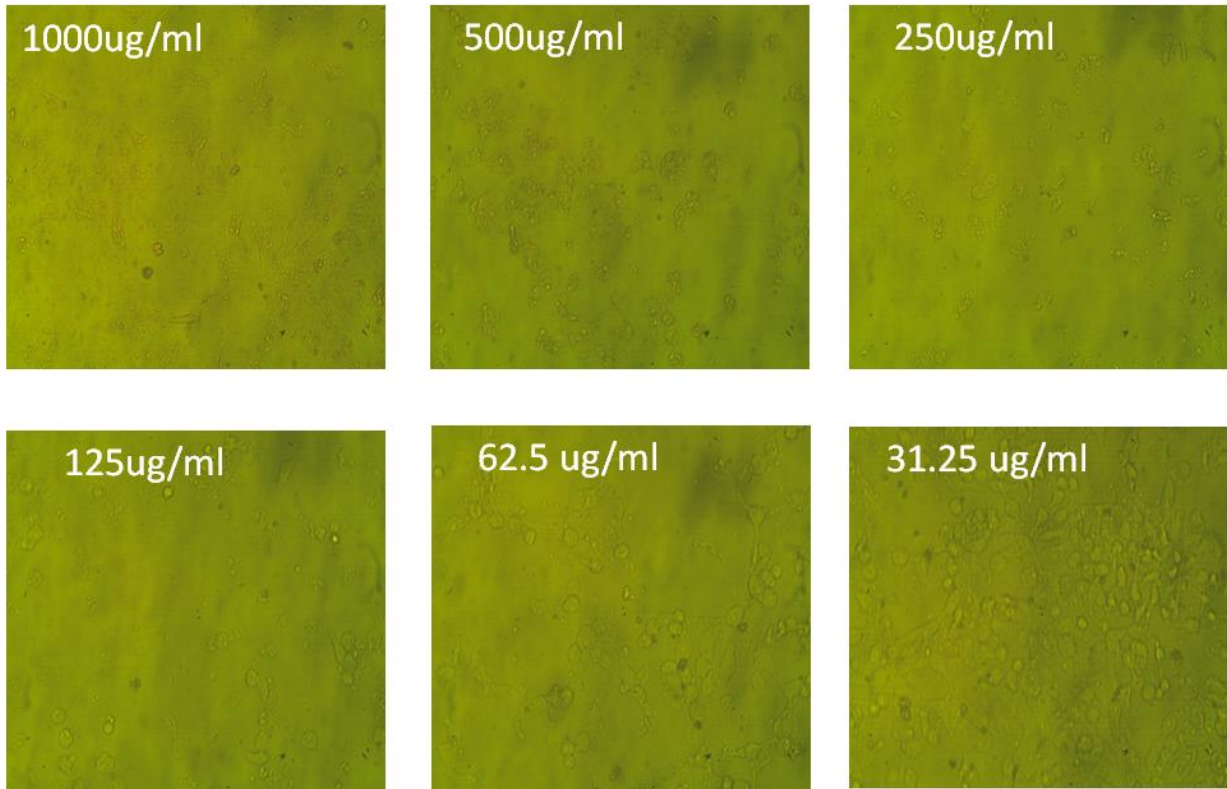

## Effect of sample ligand on Mcf7 cells at different concentration

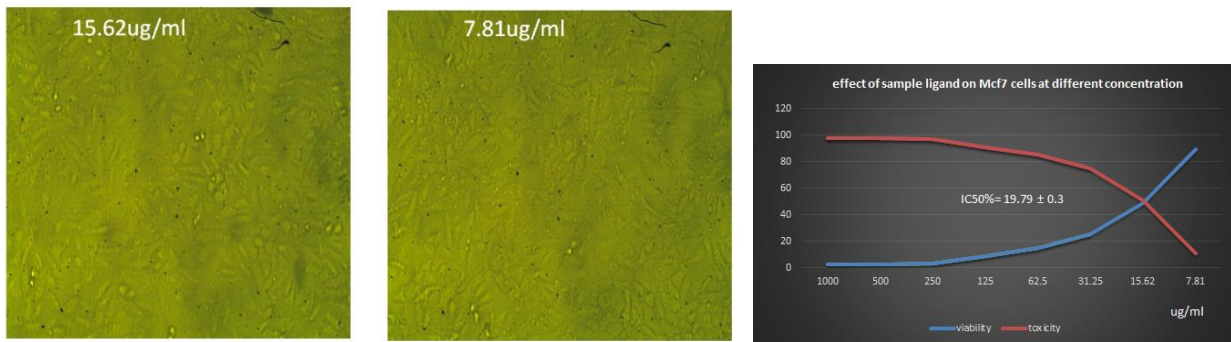

Fig. S9

## Effect of sample Zn on MCF7 cells at different concentration

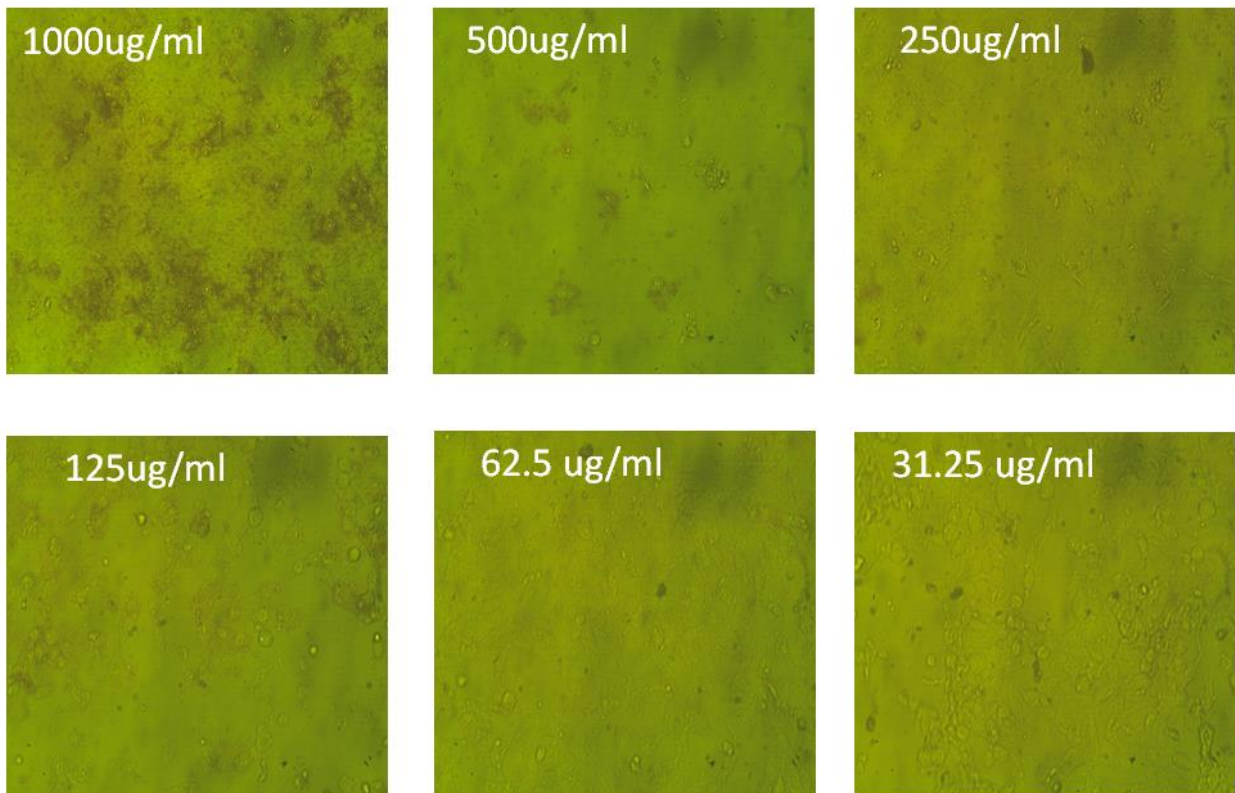

## Effect of sample Zn on MCF7 cells at different concentration

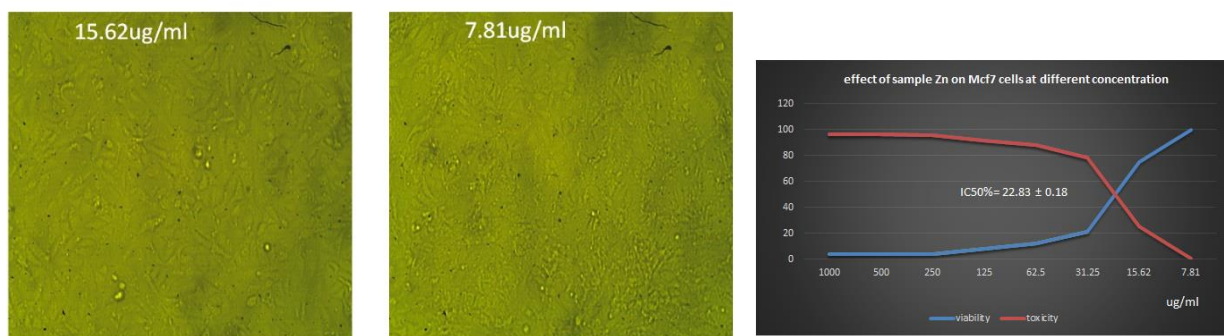

Fig. S10



## Effect of sample cu on Mcf7 cells at different concentration

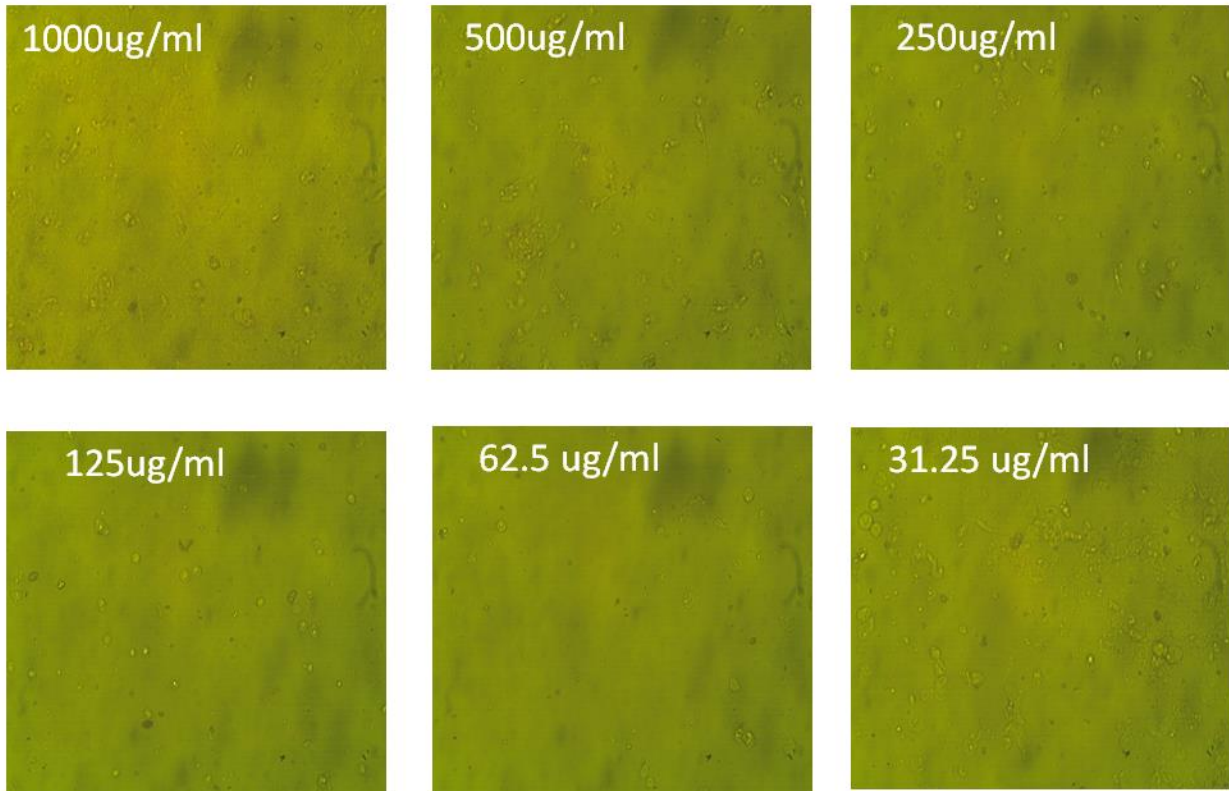

## Effect of sample Cu on Mcf7 cells at different concentration

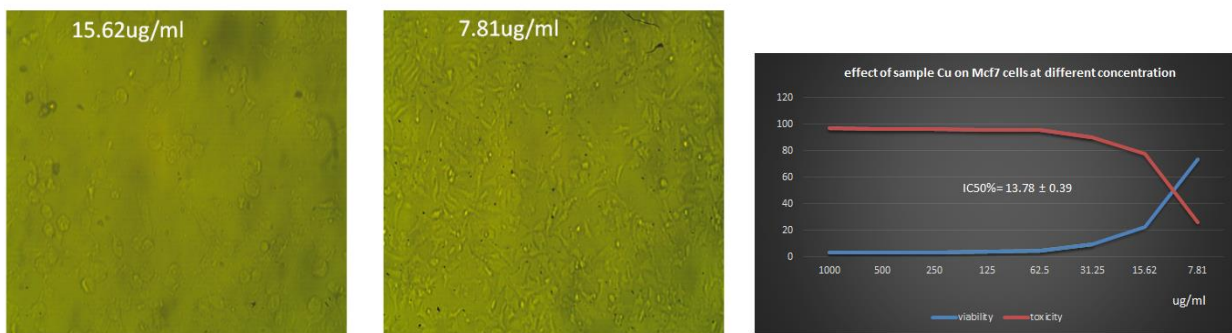

Fig. S11

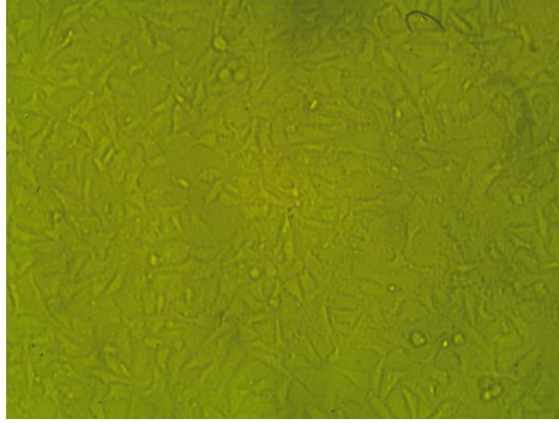

**control  
Mcf10A cells**

Organism : *Homo sapiens*, human  
Tissue : Human mammary epithelial cell  
Cell Type : epithelial  
Culture Properties : adherent  
ATCC : CRL-10317

**Fig. S12**

## Effect of sample ligand RT on MCF10A cells at different concentration

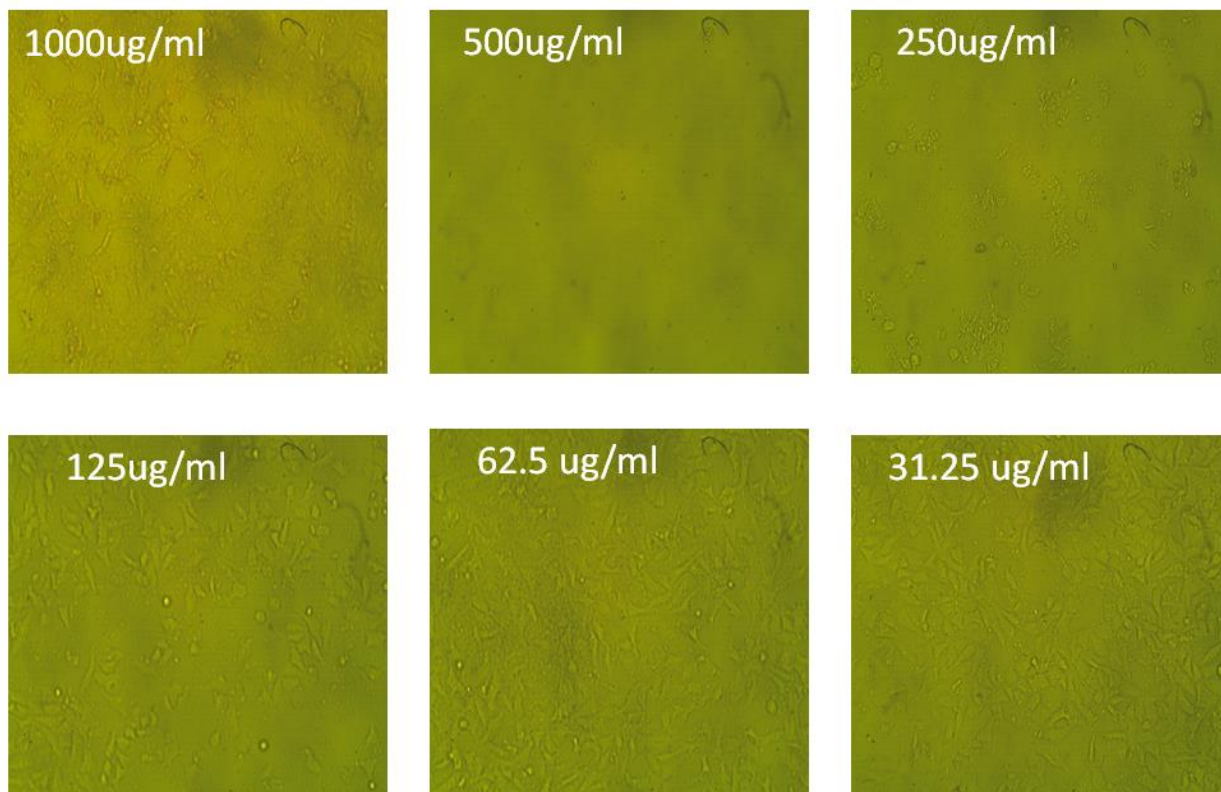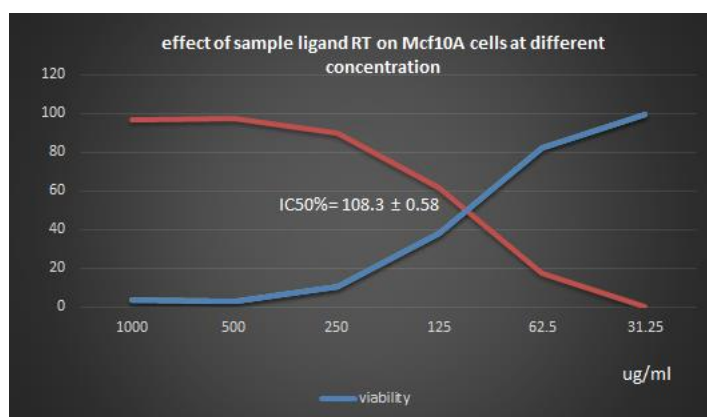

Fig. S13

## Effect of sample Zn RT on MCF10A cells at different concentration

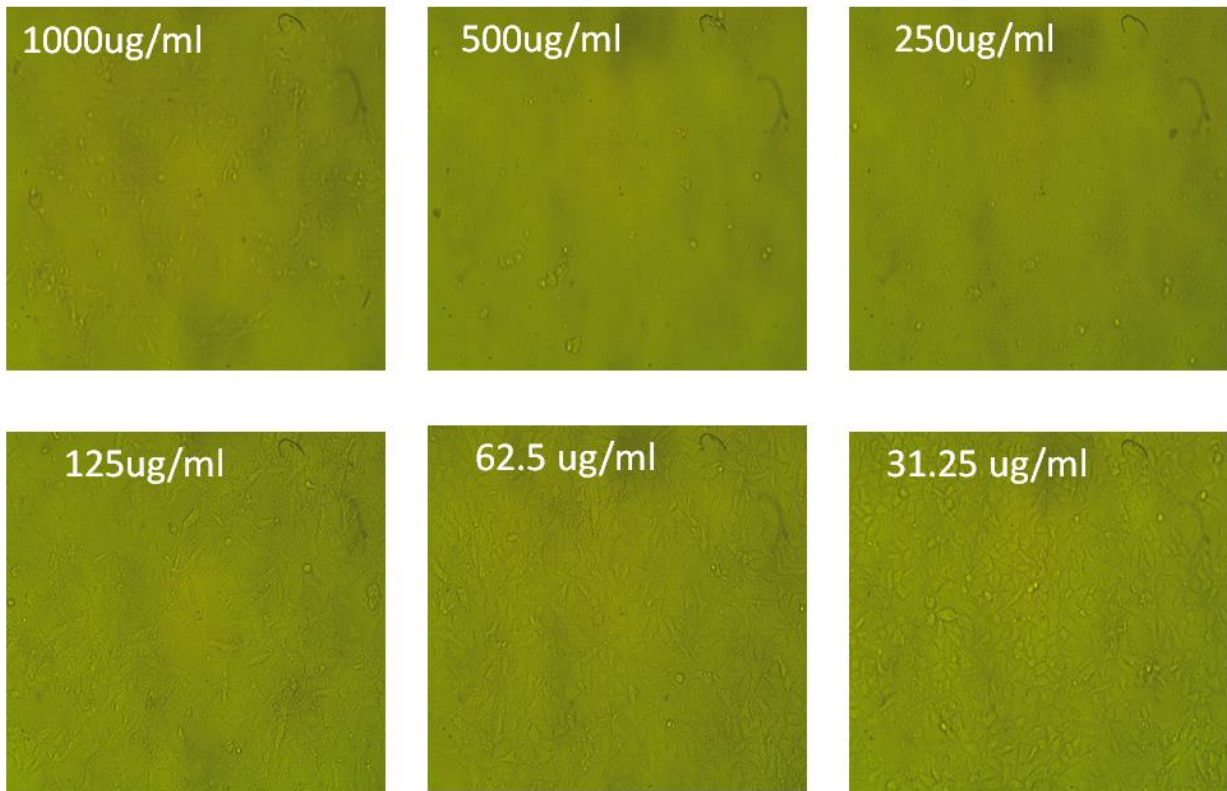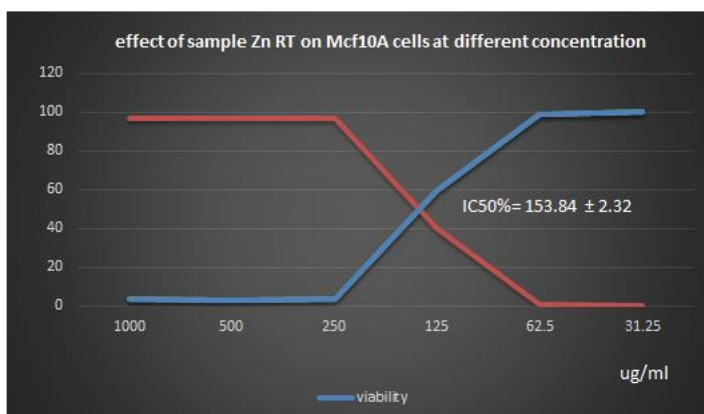

Fig. S14



### Effect of sample Cu RT on MCF10A cells at different concentration

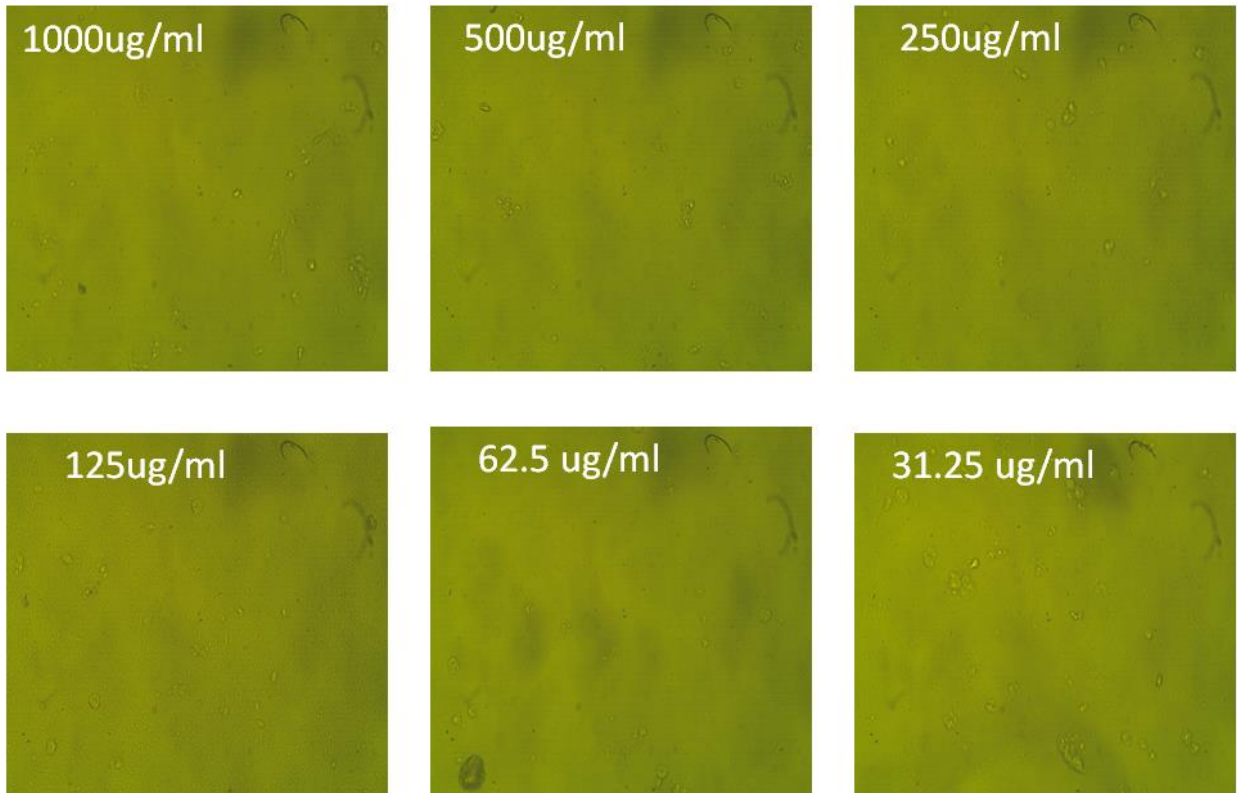

### Effect of sample Cu RT on MCF10A cells at different concentration

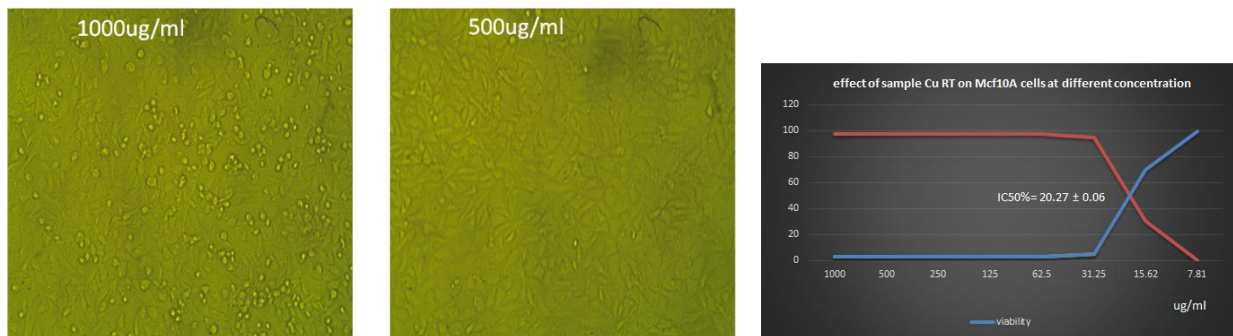

Fig. S15



## Effect of sample Co RT on MCF10A cells at different concentration

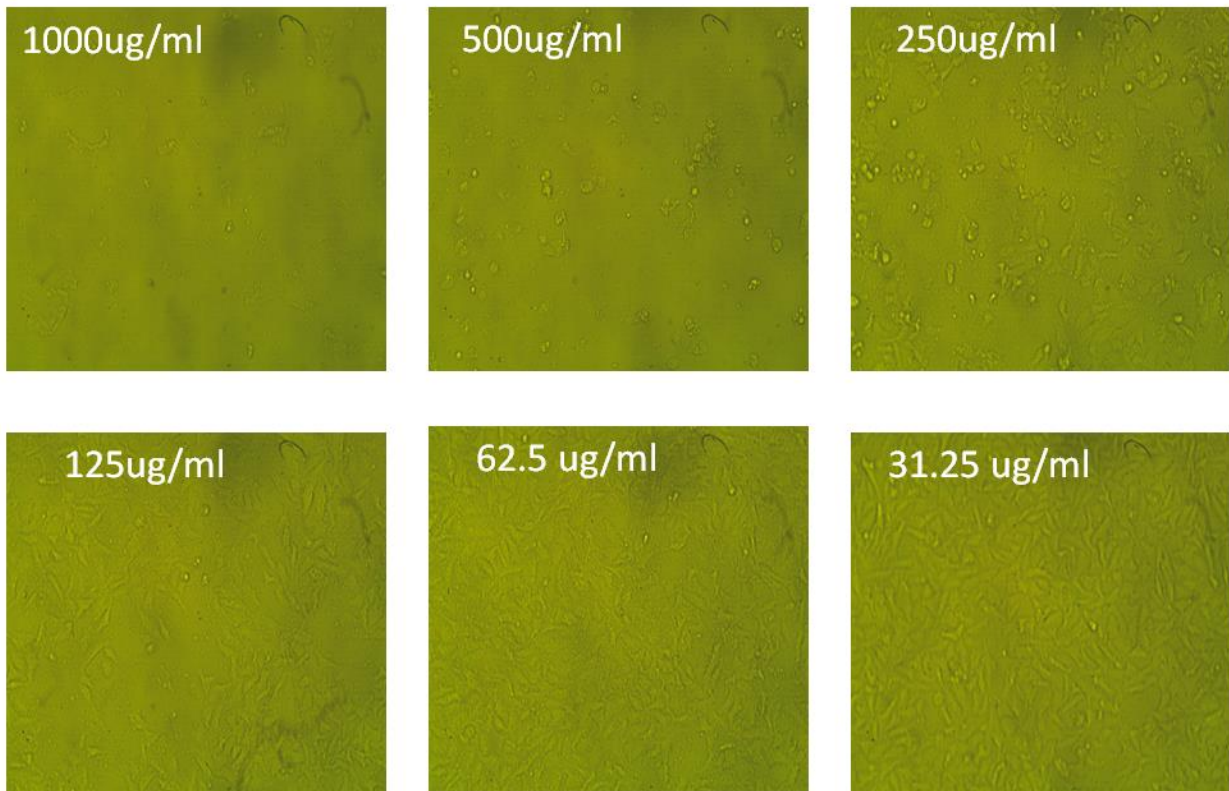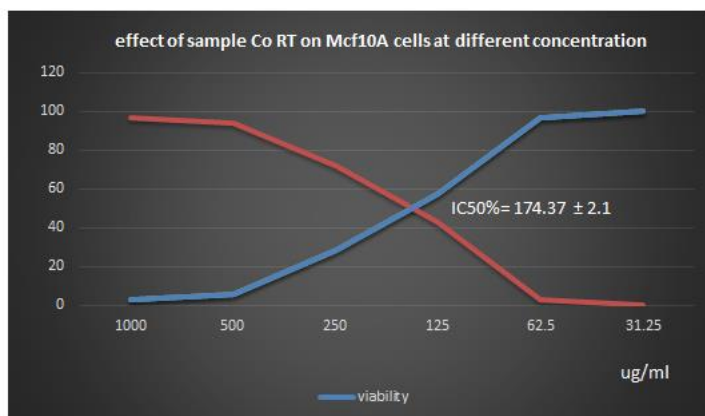

Fig. S16

## Effect of sample co on Mcf7 cells at different concentration

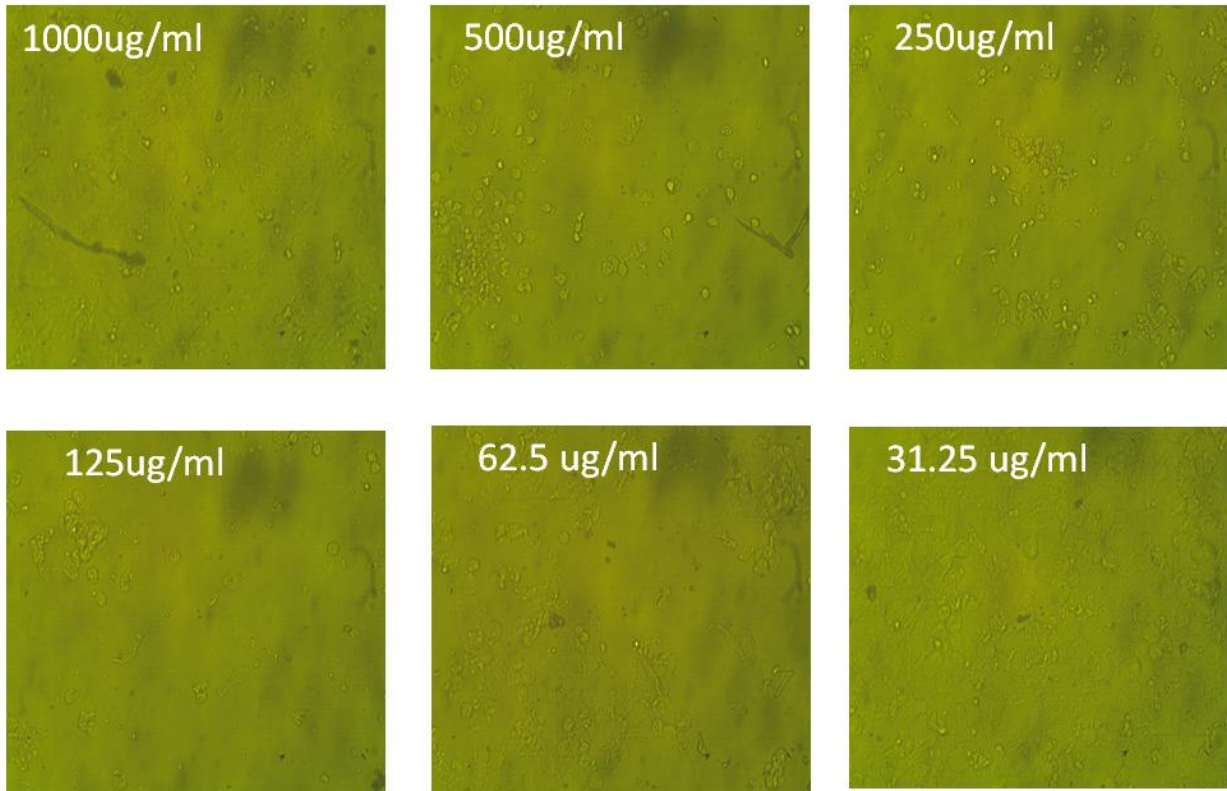

## Effect of sample Co on Mcf7 cells at different concentration

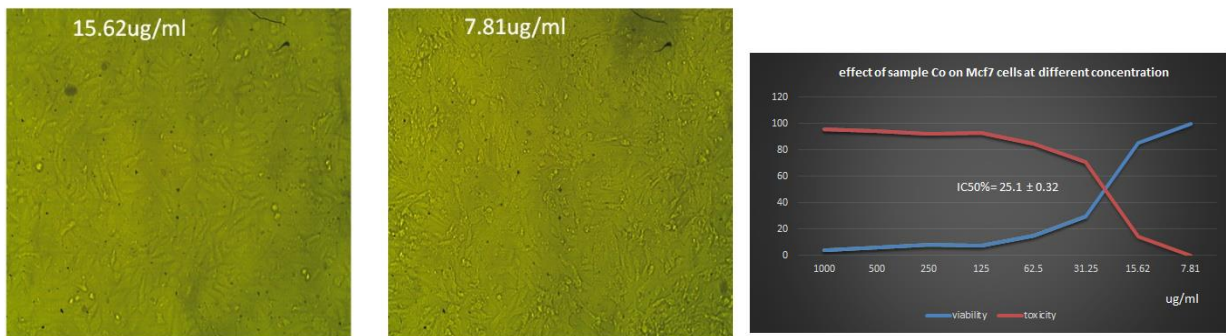

Fig. S17

**Table S1:** List of primers sequences used for RT-PCR analysis

| <b>Primers</b> | <b>Forward sequence</b>       | <b>Reverse sequence</b>        |
|----------------|-------------------------------|--------------------------------|
| P53            | 5'-AACGGTACTCCGCCACC-3'       | 5'-CGTGTCACCGTCGTGGA-3'        |
| Bax            | 5'-CTGAGCTGACCTTGGAGC-3'      | 5'-GACTCCAGCCACAAAGATG-3'      |
| Bcl2           | 5'-TATAAGCTGTCGCAGAGGGGCTA-3' | 5'-GTACTCAGTCATCCACAGGGCGAT-3' |

**Table S2:** comparison between the anticancer activity of new Cu(II) complex with reported ones

| Nr | compound               | Structure                                                                           | IC <sub>50</sub> (μM) | Ref.      |
|----|------------------------|-------------------------------------------------------------------------------------|-----------------------|-----------|
| 1  | Cisplatin              | 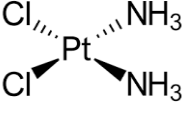   | 12.25 ± 0.35          | [S1]      |
| 2  | Carboplatin            |    | 73.48                 | [S2]      |
| 3  | Oxaliplatin            |    | 21.92                 | [S2]      |
| 4  | Cu(trp) <sub>2</sub>   |    | 18.32                 | [S3]      |
| 5  | Cu(Hqmba)(qmbn)        |   | 10.91 ± 1.1           | [S4]      |
| 6  | Cu(Hqmba) <sub>2</sub> |  | 13.89 ± 1.1           | [S4]      |
| 7  | CuPAHMQ                |                                                                                     | 11.69                 | This work |

**Table S3** Results of molecular docking for two receptors.

| Compounds   | PDB ID | Receptors                   | Energy (kcal/mol) | Bonds formed between functional groups of component and protein residues |                                             |
|-------------|--------|-----------------------------|-------------------|--------------------------------------------------------------------------|---------------------------------------------|
|             |        |                             |                   | Functional groups                                                        | Residues                                    |
| PAHMQ       | 3OCB   | AKT1 kinase                 | -6.4712           | O, cyclohexone                                                           | Thr 305, Lys 389                            |
| CuPAHMQ     |        |                             | -8.4891           | H <sub>2</sub> O, Benzene, Cl,                                           | Glu 322, Lys 386, Glu 365, Met 363          |
| Selumetinib |        |                             | -7.8964           | Br, Benzene, OH                                                          | Thr 195, Phe 161, Asp 274                   |
| PAHMQ       | 3QX3   | Topoisomerase II inhibitors | -6.0931           | Benzene, N, O, Cyclohexone                                               | Asn 867, Gln 742, Lys 739, Gly 871, Asn 786 |
| CuPAHMQ     |        |                             | -51.3505          | N, H <sub>2</sub> O, Benzene, Cl                                         | His 777, Asp 559, Glu 477, Gly 504, Lys 505 |
| Doxorubicin |        |                             | -5.9348           | NH <sub>3</sub> , O, OH                                                  | Gly 737, Gln 742, Lys 739, Arg 945, Asn 786 |

[S1]

[S2] Alami, N., Li, Z., Engel, J., & Leyland-Jones, B. (2007). Comparative preclinical antiproliferative activity of lobaplatin vs cisplatin, carboplatin, oxaliplatin and satraplatin in breast and ovarian cancers. *Cancer Research*, 67(9\_Supplement), 4780-4780.

[S3] Balsa, L. M., Ruiz, M. C., de la Parra, L. S. M., Baran, E. J., & León, I. E. (2020). Anticancer and antimetastatic activity of copper (II)-tropolone complex against human breast cancer cells, breast multicellular spheroids and mammospheres. *Journal of Inorganic Biochemistry*, 204, 110975.

[S4] Ali, A., Banerjee, S., Kamaal, S., Usman, M., Das, N., Afzal, M., ... & Ahmad, M. (2021). Ligand substituent effect on the cytotoxicity activity of two new copper (ii) complexes bearing 8-hydroxyquinoline derivatives: Validated by MTT assay and apoptosis in MCF-7 cancer cell line (human breast cancer). *RSC advances*, 11(24), 14362-14373.
